# Supplementary material for: Highly transparent films of new copolyesters derived from terephthalic and 2,4-furandicarboxylic acids
Source: Royal Society of Chemistry journal article supplement (doi:10.1039/c9py00844f), 2019-01-01
Supplement: c9py00844f1.pdf [file c9py00844f1.pdf]

## Electronic Supplementary Information for:

### Highly transparent films of new copolyesters derived from terephthalic and 2,4-furandicarboxylic acids

Sami Zaidi,<sup>a,b</sup> Shanmugam Thiyagarajan,<sup>\*c</sup> Abdelkader Bougarech,<sup>b</sup> Fouzia Sebti,<sup>a</sup> Souhir Abid,<sup>b</sup> Majdi Abid,<sup>b</sup> Armando J. D. Silvestre<sup>a</sup> and Andreia F. Sousa<sup>\*a</sup>

E-mail: shanmugam.thiyagarajan@wur.nl, andreiafs@ua.pt

#### Table of contents

|                                                                                                 |   |
|-------------------------------------------------------------------------------------------------|---|
| 1. ATR FTIR analysis of the PET-co-2,4-PEF copolyesters and PET and 2,4-PEF homopolyesters..... | 2 |
| 2. <sup>1</sup> H, <sup>13</sup> C and 2D HSQC analysis of the PET-co-2,4-PEF copolyesters..... | 2 |
| 3. DMTA analysis.....                                                                           | 5 |

## 1. ATR FTIR analysis of the PET-co-2,4-PEF copolyesters and PET and 2,4-PEF homopolyesters

**Table S1:** Vibrational assignment of the FTIR-ATR spectra of the (co)polyesters.

| vibrational modes<br>assignments                                  | wavenumber / cm <sup>-1</sup> |            |            |            |            |            |            |
|-------------------------------------------------------------------|-------------------------------|------------|------------|------------|------------|------------|------------|
|                                                                   | PET                           | (90/10)    | (85/15)    | (50/50)    | (15/85)    | (10/90)    | 2,4-PEF    |
| =C–H stretching, typical of the furan ring                        | -                             | 3143       | 3143       | 3143       | 3143       | 3143       | 3143       |
| asymmetric and symmetric stretching mode of the C-H groups        | 2961, 2855                    | 2961, 2855 | 2961, 2855 | 2961, 2855 | 2961, 2855 | 2961, 2855 | 2961, 2855 |
| C=O stretching vibration, characteristic of ester groups          | 1713                          | 1713       | 1713       | 1713       | 1713       | 1713       | 1713       |
| C=C asymmetric stretching characteristic of the furan heterocycle | -                             | 1589       | 1589       | 1589       | 1589       | 1589       | 1589       |
| vibrational mode characteristic of the benzenic ring              | 1119                          | 1119       | 1119       | 1119       | 1119       | 1119       | -          |
| vibrational mode characteristic of the benzenic ring              | 726                           | 726        | 726        | 726        | 726        | 726        |            |

## 2. <sup>1</sup>H, <sup>13</sup>C and 2D HSQC analysis of the PET-co-2,4-PEF copolyesters

**Table S2:** <sup>1</sup>H NMR resonances [300 MHz, TCE-d<sub>2</sub>, reference δ (TCE-d<sub>2</sub>) =6 ppm] of PET-co-2,4-PEF copolyesters, PET and 2,4-PEF homopolyesters.

| Integration area |                   |                                                                  |      |                |         |         |         |         |         |
|------------------|-------------------|------------------------------------------------------------------|------|----------------|---------|---------|---------|---------|---------|
| δ /ppm           | Multiplicity<br>a | Assignments                                                      | PET  | PET-co-2,4-PEF |         |         |         |         | 2,4-PEF |
|                  |                   |                                                                  |      | (90/10)        | (85/15) | (50/50) | (15/85) | (10/90) |         |
| 8.15             | s                 | f                                                                | -    | 0.05           | 0.08    | 0.41    | 1.00    | 1.00    | 1.00    |
| 8.10             | s                 | a                                                                | 1.00 | 1.00           | 1.00    | 1.00    | 0.71    | 0.37    | -       |
| 7.50             | s                 | e                                                                | -    | 0.03           | 0.04    | 0.31    | 0.98    | 0.93    | 1.00    |
| 4.69             | s                 | b                                                                | 0.78 | 0.84           | 0.79    | 0.81    | 0.17    | 0.24    | -       |
| 4.65             | s                 | g, c                                                             | -    | 0.09           | 0.13    | 0.50    | 0.66    | 0.78    | -       |
| 4.61             | s                 | l                                                                | -    | 0.11           | 0.17    | 0.84    | 1.62    | 1.45    | 1.95    |
| 4.59             | s                 | j,d                                                              | -    | -              | -       | -       | 0.58    | 0.54    | 0.69    |
| 4.58             | s                 | i,h                                                              | -    | -              | -       | -       | 0.54    | 0.47    | 0.52    |
| 4.56             | s                 | k                                                                | -    | 0.02           | 0.03    | 0.28    | 1.15    | 1.04    | 1.16    |
| 4.47             | t                 | <u>CH<sub>2</sub>CH<sub>2</sub>OCH<sub>2</sub>CH<sub>2</sub></u> | -    | 0.06           | 0.04    | tr.     | 0.02    | tr.     | tr.     |
| 3.96             | t                 | <u>CH<sub>2</sub>OCH<sub>2</sub></u>                             | -    | 0.06           | 0.04    | tr.     | 0.02    | tr.     | tr.     |

<sup>a</sup> s = singlet, t = triplet, m = multiplet, tr. = trace

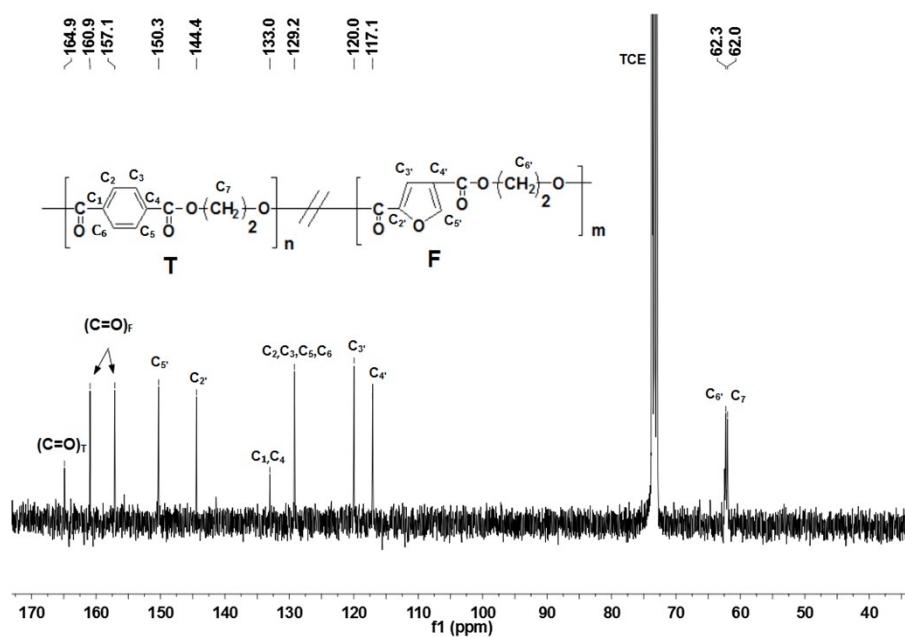

**Fig. S1:**  $^{13}\text{C}$  NMR spectrum of PET-co-2,4-PEF 15/85 in TCE-d<sub>2</sub>.

**Table S3:** Assignment of the  $^{13}\text{C}$  NMR chemical shifts relative to PET-co-2,4-PEF (co)polyesters

| $\delta$ /ppm | Assignments        |
|---------------|--------------------|
| 164.9         | (C=O) <sub>T</sub> |
| 160.9         | (C=O) <sub>F</sub> |
| 157.1         | (C=O) <sub>F</sub> |
| 150.3         | C5'                |
| 144.4         | C2'                |
| 133.0         | C1,C4              |
| 129.2         | C2,C3,C5,C6        |
| 120.0         | C4'                |

|       |     |
|-------|-----|
| 117.1 | C3' |
| 62.3  | C7  |
| 62.0  | C6' |

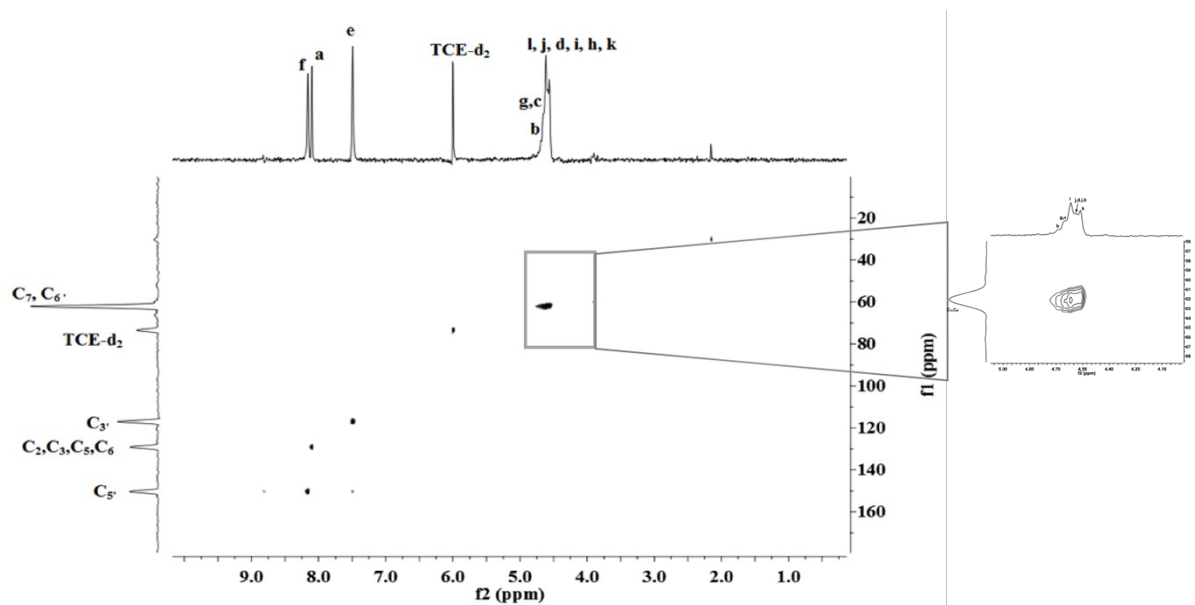

**Fig. S2:** 2D HSQC NMR spectrum of PET-co-2,4-PEF (15/85) recorded in TCE-d<sub>2</sub> and insight zoom in the region comprehended in between 4.56 and 4.69 ppm.

**Table S4:** Correlation between the nomenclature followed in <sup>13</sup>C and <sup>1</sup>H NMR attributions.

| <sup>13</sup> C NMR nomenclature | <sup>1</sup> H NMR nomenclature |
|----------------------------------|---------------------------------|
| C2                               | a                               |
| C3                               | a                               |
| C5                               | a                               |

|     |               |
|-----|---------------|
| C6  | a             |
| C7  | b, c, g       |
| C3' | e             |
| C5' | f             |
| C6' | l, j, k, h, l |

---

### 3. DMTA analysis

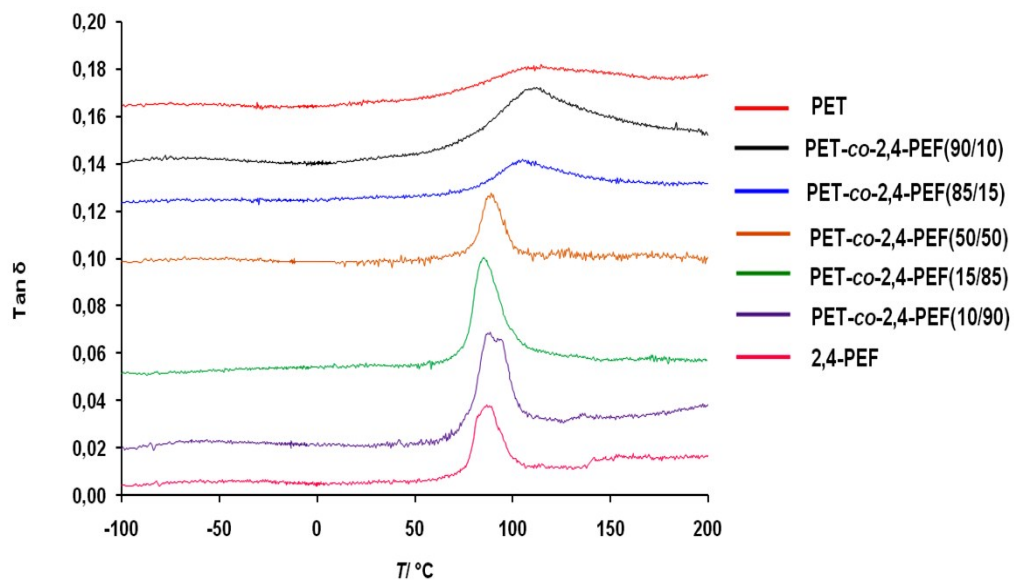

**Fig. S3:** Tan  $\delta$  of PET-co-2,4-PEF (co)polyesters at 1 Hz.
